# Supplementary material
Source: PubMed Central journal article supplement (PMC2577259)
Supplement: pp.108.126953_1.pdf [file pp.108.126953_1.pdf]

**Table S1:**

The different morphological criteria used to identify *Arabidopsis* SAM cells at different stages of the cell cycle in TEM micrographs prior to 3D reconstruction and modeling.

| <b>Criterion</b>                       | <b>Changes observed</b>                                                                                                                                                                                                                                                                                                                                                                                                                                                                                                                                                                                                     | <b>References</b>                                                                           |
|----------------------------------------|-----------------------------------------------------------------------------------------------------------------------------------------------------------------------------------------------------------------------------------------------------------------------------------------------------------------------------------------------------------------------------------------------------------------------------------------------------------------------------------------------------------------------------------------------------------------------------------------------------------------------------|---------------------------------------------------------------------------------------------|
| <b><i>For interphasic cells</i></b>    |                                                                                                                                                                                                                                                                                                                                                                                                                                                                                                                                                                                                                             |                                                                                             |
| nuclear/cytoplasmic surface area ratio | progressively decreases from G1 to G2                                                                                                                                                                                                                                                                                                                                                                                                                                                                                                                                                                                       | (Seguí-Simarro and Staehelin, 2006)                                                         |
| nuclear size                           | increases as the nuclear genome replicates at the S phase                                                                                                                                                                                                                                                                                                                                                                                                                                                                                                                                                                   | (Jovtchev et al., 2006; Seguí-Simarro and Staehelin, 2006)                                  |
| nucleolar architecture                 | <ul style="list-style-type: none"> <li>- Reactivates after mitosis (G0-G1): small, mostly composed of dense fibrillar component (DFC) and few, large and heterogeneous fibrillar centers (FC). Neither granular component (GC) nor nucleolar vacuoles (NV) are present.</li> <li>- Progressively resumes activity and enlarges from G1 to G2: GC appears at the nucleolar periphery. Small and numerous homogeneous FC within the DFC.</li> <li>- At the G2/M transition, the largest and most active nucleoli are present. Abundant GC intermingled with the DFC. Many homogeneous CF. A central NV is present.</li> </ul> | (Risueño and Medina, 1986; Risueño <i>et al.</i> , 1988)                                    |
| cell wall thickness                    | after a new cell wall is formed, progressively increases from G1 to G2 as the cell grows                                                                                                                                                                                                                                                                                                                                                                                                                                                                                                                                    | (Risueño et al., 1968; Seguí-Simarro and Staehelin, 2006)                                   |
| <b><i>For dividing cells</i></b>       |                                                                                                                                                                                                                                                                                                                                                                                                                                                                                                                                                                                                                             |                                                                                             |
| Nuclear envelope                       | Dismantles at prometaphase and reassembles at telophase                                                                                                                                                                                                                                                                                                                                                                                                                                                                                                                                                                     | (Seguí-Simarro and Staehelin, 2006)                                                         |
| Condensed chromosomes                  | <ul style="list-style-type: none"> <li>- Condense at prophase</li> <li>- Arrange at metaphase (metaphasic plate)</li> <li>- Migrate to the poles at anaphase</li> <li>- Decondense at late telophase</li> </ul>                                                                                                                                                                                                                                                                                                                                                                                                             | (Seguí-Simarro and Staehelin, 2006)                                                         |
| Cell plate architecture                | <ul style="list-style-type: none"> <li>- Arises as phragmoplast initials at late anaphase</li> <li>- expands centrifugally at early telophase (solid phragmoplast stage)</li> <li>- Initiates central maturation while keeps expanding at the borders (transitional phragmoplast stage)</li> <li>- Fuses with the mother cell wall and matures at late telophase (ring phragmoplast stage)</li> </ul>                                                                                                                                                                                                                       | (Seguí-Simarro et al., 2004; Seguí-Simarro and Staehelin, 2006; Seguí-Simarro et al., 2007) |
